# Supplementary material
Source: PubMed Central journal article supplement (PMC6196829)
Supplement: DC181032SupplementaryData3.pdf [file DC181032SupplementaryData3.pdf]

## **Bone Mineral Density in Childhood Study**

Shana E. McCormack, Jonathan A. Mitchell, Andrea Kelly, Heidi J. Kalkwarf, Joan M. Lappe,  
John A. Shepherd, Sharon E. Oberfield, Vicente Gilsanz, Babette S. Zemel
